# Supplementary material for: A 280 μW cm−2 biofuel cell operating at low glucose concentration
Source: Royal Society of Chemistry journal article supplement (doi:10.1039/b801786g), 2008-01-01
Supplement: b801786g.pdf [file b801786g.pdf]

Supplementary information for

**A 280  $\mu\text{W}\cdot\text{cm}^{-2}$  biofuel cell operating at low glucose concentration**

Nicolas Mano

Manuscript number: B801786G

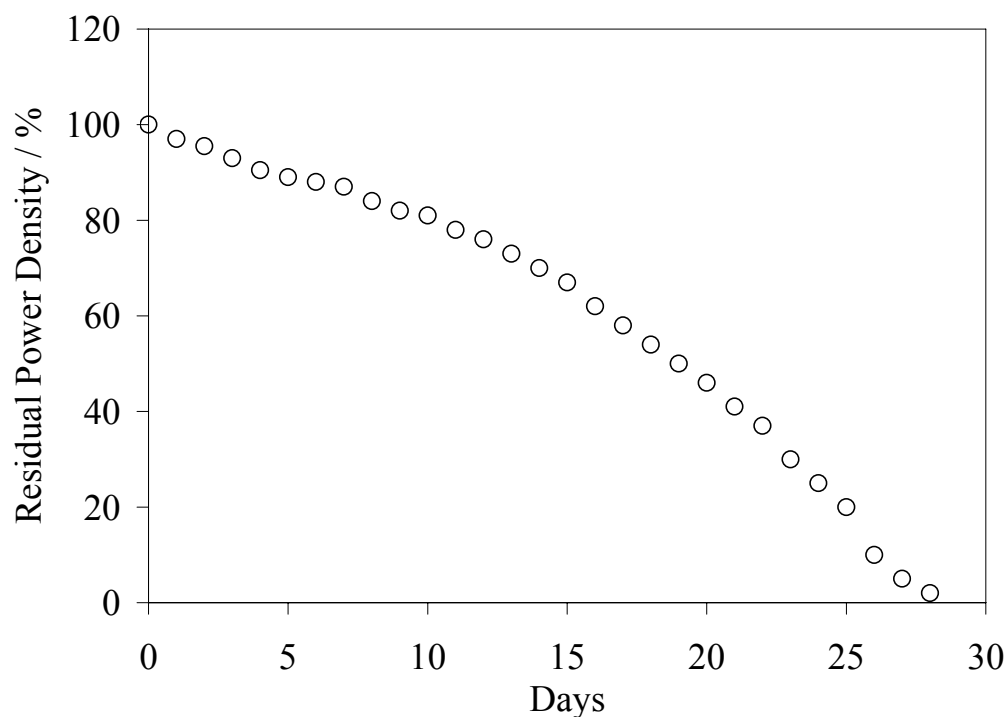

Stability of the biofuel cell made with “wired” *P. pinophilum*. 32 mM glucose, 0.14 M NaCl, under air, 37 °C, 20 mM citrate buffer pH 5
